# Supplementary material for: Matching drug and polymer for efficient delivery of anti-inflammatory drugs: PLGA, polyesteramides, and acetalated dextran
Source: Royal Society of Chemistry journal article supplement (doi:10.1039/d5tb01949d), 2025-01-01
Supplement: d5tb01949d1.pdf [file d5tb01949d1.pdf]

# Supporting information

## Matching drug and polymer for efficient delivery of anti-inflammatory drugs: PLGA, polyesteramides and acetalated dextran

Lea C. Klepsch <sup>a, b</sup>, Philipp Dahlke <sup>c</sup>, Mira Behnke <sup>a, b</sup>, Ekaterina Tsarenko <sup>a, b</sup>, Natalie E. Göppert <sup>a, b</sup>, Paul Klemm <sup>a, b</sup>, Jakob Meyer <sup>a, b</sup>, Alan George <sup>d</sup>, Mingzhe Chi <sup>d</sup>, Justyna A. Czaplewska <sup>a, b</sup>, Antje Vollrath <sup>a, b</sup>, Christine Weber <sup>a, b</sup>, Paul M. Jordan <sup>b, c</sup>, Stephanie Schubert <sup>a, b</sup>, Stephanie Hoeppener <sup>a, b</sup>, Ivo Nischang <sup>a, b, e, f</sup>, Marek Sierka <sup>b, d</sup>, Oliver Werz <sup>b, c</sup>, Ulrich S. Schubert <sup>a, b, e\*</sup>

\* Corresponding author

<sup>a</sup> *Laboratory of Organic and Macromolecular Chemistry (IOMC)  
Friedrich Schiller University Jena, Humboldtstraße 10, 07743 Jena, Germany*

<sup>b</sup> *Jena Center for Soft Matter (JCSM)  
Friedrich Schiller University Jena, Philosophenweg 7, 07743 Jena, Germany*

<sup>c</sup> *Department of Pharmaceutical/Medicinal Chemistry, Institute of Pharmacy  
Friedrich Schiller University Jena, Philosophenweg 14, 07743 Jena, Germany*

<sup>d</sup> *Otto Schott Institute of Materials Research (OSIM), Friedrich Schiller University Jena,  
Löbdergraben 32, 07743 Jena, Germany*

<sup>e</sup> *Helmholtz Institute for Polymers in Energy Applications Jena (HIPOLE Jena), Lessingstraße 12-14, 07743 Jena, Germany*

<sup>f</sup> *Helmholtz-Zentrum Berlin für Materialien und Energie GmbH (HZB), Hahn-Meitner-Platz 1, 14109 Berlin, Germany*

### 1 Table of contents

|     |                                 |    |
|-----|---------------------------------|----|
| 2   | Synthesis of polymers.....      | 2  |
| 2.1 | Materials.....                  | 2  |
| 2.2 | Instrumentation.....            | 2  |
| 2.3 | Synthesis of PPheG .....        | 2  |
| 2.4 | Synthesis of PValG .....        | 3  |
| 2.5 | Synthesis of Ac-Dex .....       | 4  |
| 3   | Formulation details .....       | 4  |
| 4   | Particle characteristics.....   | 5  |
| 4.1 | DLS.....                        | 7  |
| 4.2 | BRP-201 drug precipitates ..... | 8  |
| 5   | HPLC measurements .....         | 11 |
| 6   | References.....                 | 14 |

## 2 Synthesis of polymers

### 2.1 Materials

(*S*)-3-*iso*-propylmorpholine-2,5-dione (ValG) and (*S*)-3-benzylmorpholine-2,5-dione (PheG) were synthesized according to Dirauf *et al.*<sup>[1]</sup> and Göppert *et al.*,<sup>[2]</sup> respectively. 1,3-Bis(3,5-bis(trifluoromethyl)phenyl)thiourea (TU) was synthesized according to Pratt *et al.*<sup>[3]</sup> 1,8-Diazabicyclo(5.4.0)undec-7-ene ( $\geq 99.0\%$ , DBU), benzyl alcohol (99.8%, BnOH), and benzoic acid ( $\geq 99.5\%$ ) were purchased from Sigma-Aldrich. Dextran from *Leuconostoc mesenteroides* (average molar mass 9.000–11.000 g mol<sup>-1</sup>), 2-methoxy-propene (97%), Pyridinium *p*-toluenesulfonate (PPTS, 98%) and dimethylsulfoxide (DMSO, anhydrous  $\geq 99.9\%$ ) were obtained from Sigma-Aldrich. Triethylamine (99%) was purchased from Thermo Scientific. Dichloromethane (CH<sub>2</sub>Cl<sub>2</sub>) was dried in a solvent purification system (MB SPS-800, MBRAUN). All other chemicals and solvents were purchased from common suppliers and used without further purification.

### 2.2 Instrumentation

Proton (<sup>1</sup>H) nuclear magnetic resonance (NMR) spectra were measured on a Bruker AC 300 MHz spectrometer in CDCl<sub>3</sub> at room temperature using the residual non-deuterated solvent signal for chemical shift referencing.

Size exclusion chromatography (SEC) measurements were conducted on an Agilent 1200 series system equipped with a PSS degasser, a G1310A pump, a G1329A autosampler, a Techlab oven set to 40 °C, a PSS GRAM guard/30/1 000 Å column (10 µm particle size) and a G1362A refractive index detector (RID). *N,N*-Dimethylacetamide (DMAc) with 0.21 wt% LiCl was utilized as an eluent at a flow rate of 1 mL min<sup>-1</sup>. The molar masses were estimated using PMMA standards (400 to 1 000 000 g mol<sup>-1</sup>) from Polymer Standard Services (PSS).

Ring-opening polymerizations (ROP) were performed in a glovebox (MBRAUN) under nitrogen atmosphere.

### 2.3 Synthesis of PPheG

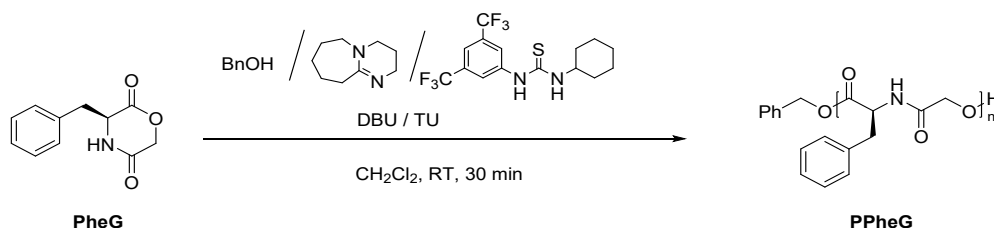

**Scheme S1:** Schematic representation of the ring-opening polymerization of **PheG** yielding poly((*S*)-3-benzylmorpholine-2,5-dione) (**PPheG**).

According to a molar [PheG]:[BnOH]:[DBU]:[TU] ratio of 100:1:1:10 and an initial monomer concentration of 0.5 mol L<sup>-1</sup>, PheG (1.2 g, 5.85 mmol) was dissolved in 11.5 mL of CH<sub>2</sub>Cl<sub>2</sub>. A solution of benzyl alcohol (6.1 µL, 58 µmol), DBU (8.7 µL, 58 µmol) and TU (217 mg, 580 µmol) in 100 µL of CH<sub>2</sub>Cl<sub>2</sub> was added to start the polymerization. The solution was stirred at room temperature for 40 min, and subsequently quenched by addition of a 10-fold excess of benzoic acid (71 mg, 0.58 mmol). A sample was withdrawn to determine the monomer conversion by means of <sup>1</sup>H NMR spectroscopy. The polymer was precipitated from diethyl ether (-80 °C) twice and dried in oil pump vacuum. Yield: 0.9 g. <sup>1</sup>H NMR: Conversion: 90 %, M<sub>n,theo</sub> = 18 kg mol<sup>-1</sup>. SEC: M<sub>n</sub> = 26.5 kg mol<sup>-1</sup>, Đ = 1.46.

Characterization data (<sup>1</sup>H NMR, SEC) are depicted in **Figure S1**.

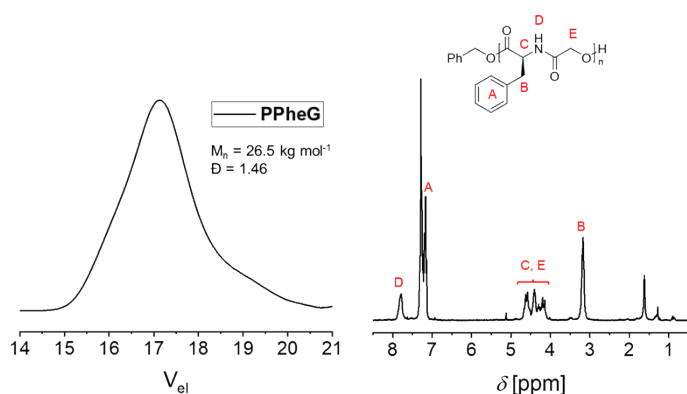

**Figure S1:** Left: SEC Elugram of **PPheG** (Eluent DMAc, RID, PMMA calibration). Right:  $^1\text{H}$  NMR spectrum of **PPheG** (300 MHz,  $\text{CDCl}_3$ ) and assignment of the signals to the schematic representation of the structure.

## 2.4 Synthesis of PValG

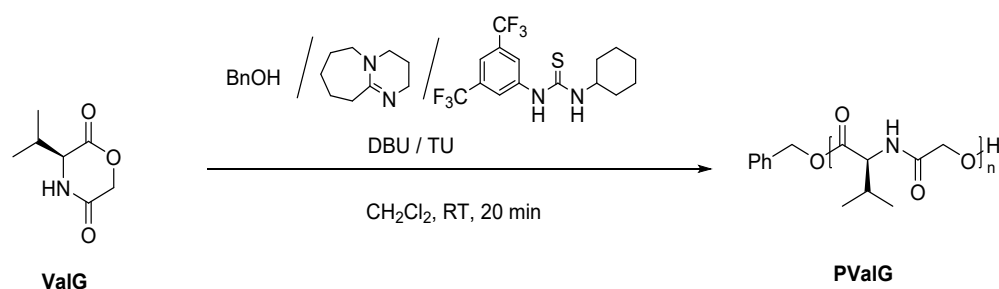

**Scheme S2:** Schematic representation of the ring-opening polymerization of ValG yielding poly((S)-3-isopropylmorpholine-2,5-dione) (**PValG**).

According to a molar [ValG]:[BnOH]:[DBU]:[TU] ratio of 100:1:1:5 and an initial monomer concentration of  $0.7 \text{ mol L}^{-1}$ , ValG (1.3 g, 8.28 mmol) was dissolved in 11.5 mL of  $\text{CH}_2\text{Cl}_2$ . A solution of benzyl alcohol (8.6  $\mu\text{L}$ , 83  $\mu\text{mol}$ ), DBU (12.4  $\mu\text{L}$ , 83  $\mu\text{mol}$ ) and TU (153 mg, 414  $\mu\text{mol}$ ) in 250  $\mu\text{L}$  of  $\text{CH}_2\text{Cl}_2$  was added to start the polymerization. The solution was stirred at room temperature for 48 min, and subsequently quenched by addition of a 10-fold excess of benzoic acid (100 mg, 0.83 mmol). A sample was withdrawn to determine the monomer conversion by means of  $^1\text{H}$  NMR spectroscopy. The polymer was precipitated from diethyl ether ( $-80^\circ\text{C}$ ) three times and dried in oil pump vacuum. Yield: 1.1 g.  $^1\text{H}$  NMR: Conversion: 93 %,  $M_{n,\text{theo}} = 14.6 \text{ kg mol}^{-1}$ . SEC:  $M_n = 26.8 \text{ kg mol}^{-1}$ ,  $\text{Đ} = 1.12$ .

Characterization data ( $^1\text{H}$  NMR, SEC) are depicted in **Figure S2**.

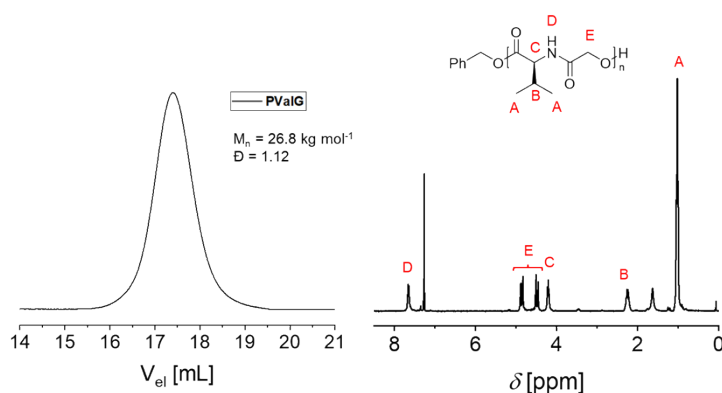

**Figure S2:** Left: SEC Elugram of **PValG** (Eluent DMAc, RID, PMMA calibration). Right:  $^1\text{H}$  NMR spectrum of **PValG** (300 MHz,  $\text{CDCl}_3$ ) and assignment of the signals to the schematic representation of the structure.

## 2.5 Synthesis of Ac-Dex

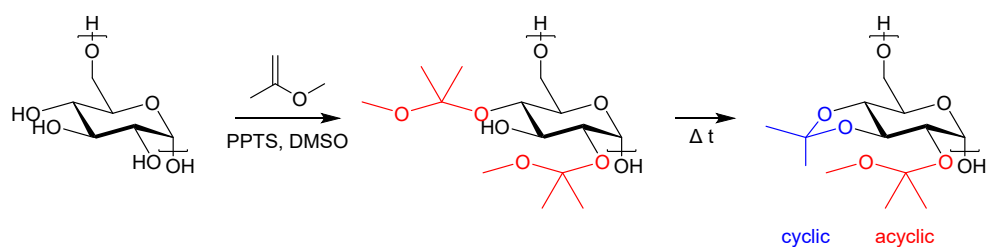

**Scheme S3:** Schematic representation of the acetalization of dextran yielding Ac-Dex.

Ac-Dex was synthesized from 10 kDa dextran according to an adapted procedure.<sup>[4]</sup> The final degree of substitution (DS) as determined via  $^1\text{H}$  NMR spectroscopy of the degradation-products (Fig. S5 Right),<sup>[5]</sup> was 2.06 (DS cyclic acetal = 1.44, DS acyclic acetal = 0.62).

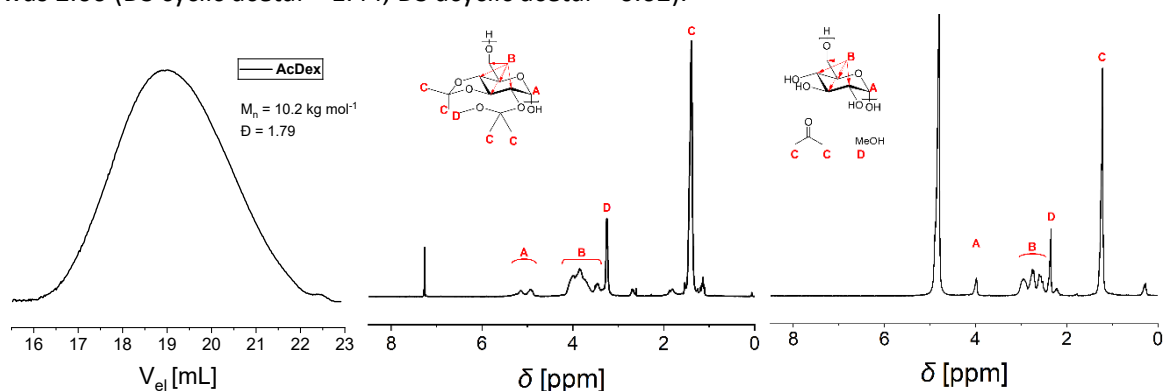

**Figure S3:** Left: SEC Elugram of **Ac-Dex** (Eluent 0.21 w% LiCl in DMAc, RID, PMMA calibration). Middle:  $^1\text{H}$  NMR spectrum of **Ac-Dex** (300 MHz,  $\text{CDCl}_3$ ) and assignment of the signals to the schematic representation of the structure. Right:  $^1\text{H}$  NMR spectrum of **Ac-Dex** (300 MHz,  $\text{D}_2\text{O}$  with DCl) and assignment of the signals to the schematic representation of the structure of its degradation products.

### 3 Formulation details

**Table S1:** Formulation parameters for nanoprecipitation of NPs. Solvent to water ratio for all formulations was 1 to 8. The water phase was a 0.3% PVA solution. All formulations performed with n = 3.

| Sample           | $c_{\text{Polymer}}$ [mg mL <sup>-1</sup> ] <sup>a</sup> | Drug feed [%] <sup>b</sup> | Solvent |
|------------------|----------------------------------------------------------|----------------------------|---------|
| PValG            | 15                                                       | -                          | acetone |
| PValG [MF-15]    | 15                                                       | 5                          | acetone |
| PValG [BRP-201]  | 10                                                       | 5                          | acetone |
| PLGA             | 15                                                       | -                          | acetone |
| PLGA [MF-15]     | 15                                                       | 5                          | acetone |
| PLGA [BRP-201]   | 10                                                       | 5                          | acetone |
| Ac-Dex           | 15                                                       | -                          | acetone |
| Ac-Dex [MF-15]   | 15                                                       | 5                          | acetone |
| Ac-Dex [BRP-201] | 10                                                       | 5                          | acetone |
| PPheG            | 15                                                       | -                          | DMSO    |
| PPheG [MF-15]    | 15                                                       | 5                          | DMSO    |
| PPheG [BRP-201]  | 10                                                       | 5                          | DMSO    |

a)  $c_{\text{Polymer}}$  in organic solvent.

b) Drug feed in wt% referred to polymer mass.

## 4 Formulation characteristics

**Table S2:** Determined characteristics of formulations.

| Sample           | $d_H$ [nm]<br>purified <sup>a</sup> | PDI<br>purified <sup>a</sup> | $\zeta$ in water<br>[mV] <sup>b</sup> | $C_{NP}$<br>[mg/mL] <sup>c</sup> | $C_{PVA}$<br>[mg/mL] <sup>e</sup> | $C_{NP \text{ w/o PVA}}$<br>[mg/mL] <sup>f</sup> | LC<br>[%] <sup>d</sup> | EE<br>[%] <sup>d</sup> | Yield<br>[%] <sup>g</sup> |
|------------------|-------------------------------------|------------------------------|---------------------------------------|----------------------------------|-----------------------------------|--------------------------------------------------|------------------------|------------------------|---------------------------|
| PValG            | 136 ± 8                             | 0.11 ± 0.03                  | -29.8 ± 2.4                           | 5.79 ± 0.13                      | 0.156 ± 0.002                     | 5.64 ± 0.13                                      | -                      | -                      | 74.2 ± 1.9                |
| PValG [MF-15]    | 146 ± 3                             | 0.07 ± 0.01                  | -31.8 ± 2.1                           | 6.60 ± 0.13                      | 0.165 ± 0.007                     | 6.43 ± 0.13                                      | 3.71 ± 0.01            | 74.3 ± 0.23            | 77.5 ± 2.2                |
| PValG [BRP-201]  | 159 ± 3                             | 0.23 ± 0.03                  | -18.0 ± 1.7                           | 2.6 ± 0.22                       | 0.139 ± 0.014                     | 2.52 ± 0.21                                      | 1.53* ± 0.00           | 26.1* ± 0.03           | 34.5 ± 16.5               |
| PLGA             | 184 ± 1                             | 0.03 ± 0.01                  | -37.3 ± 1.1                           | 6.62 ± 0.18                      | 0.141 ± 0.009                     | 6.48 ± 0.18                                      | -                      | -                      | 81.5 ± 3.9                |
| PLGA [MF-15]     | 184 ± 3                             | 0.08 ± 0.02                  | -26.5 ± 13.7                          | 7.02 ± 0.13                      | 0.146 ± 0.009                     | 6.87 ± 0.13                                      | 3.73 ± 0.05            | 74.5 ± 0.90            | 83.0 ± 2.6                |
| PLGA [BRP-201]   | 175 ± 9                             | 0.12 ± 0.04                  | -23.5 ± 2.3                           | 4.22 ± 0.32                      | 0.154 ± 0.007                     | 4.07 ± 0.33                                      | 4.08* ± 0.11           | 81.6* ± 2.24           | 67.3 ± 1.1                |
| Ac-Dex           | 133 ± 9                             | 0.06 ± 0.00                  | -19.3 ± 9.0                           | 6.11 ± 0.21                      | 0.144 ± 0.009                     | 5.96 ± 0.22                                      | -                      | -                      | 73.1 ± 1.7                |
| Ac-Dex [MF-15]   | 178 ± 8                             | 0.04 ± 0.01                  | -31.0 ± 1.1                           | 6.09 ± 0.19                      | 0.128 ± 0.016                     | 5.96 ± 0.18                                      | 4.18 ± 0.04            | 83.6 ± 0.77            | 73.5 ± 1.2                |
| Ac-Dex [BRP-201] | 192 ± 14                            | 0.06 ± 0.00                  | -29.6 ± 3.1                           | 3.57 ± 0.33                      | 0.092 ± 0.002                     | 3.48 ± 0.32                                      | 2.98* ± 0.19           | 59.6* ± 3.70           | 64.4 ± 4.7                |
| PPheG            | 110 ± 4                             | 0.05 ± 0.00                  | -22.8 ± 2.4                           | 5.13 ± 0.73                      | 0.182 ± 0.018                     | 4.95 ± 0.75                                      | -                      | -                      | 61.1 ± 11.1               |
| PPheG [MF-15]    | 120 ± 4                             | 0.03 ± 0.01                  | -29.9 ± 0.9                           | 6.41 ± 0.47                      | 0.179 ± 0.008                     | 6.23 ± 0.46                                      | 2.82 ± 0.01            | 56.3 ± 0.12            | 76.3 ± 6.9                |
| PPheG [BRP-201]  | 150 ± 6                             | 0.04 ± 0.01                  | -22.3 ± 0.6                           | 4.50 ± 0.22                      | 0.122 ± 0.013                     | 4.38 ± 0.23                                      | 3.12* ± 0.03           | 62.3* ± 0.69           | 80.4 ± 2.3                |

a) Hydrodynamic diameter ( $d_H$ , z-average) and polydispersity index (PDI) determined by DLS.

b) Zeta potential ( $\zeta$ ) determined by ELS.

c) Particle concentration after purification determined by weighting the freeze-dried particles.

d) Loading capacity (LC) and encapsulation efficiency (EE) determined by HPLC.

e) Polyvinyl alcohol (PVA) concentration in whole formulation determined by UV-Vis spectroscopy.

f) Determined PVA amount subtracted from particle concentration to determine the  $C_{NP}$  without (w/o) PVA.

g) Yield after purification determined by dividing the actual obtained particle mass by the theoretically possible particle mass multiplied by 100.

All formulations performed with  $n = 3$ , LC and EE values marked with an \* only determined for  $n = 2$ .

**Table S3:** NP characteristics after resuspension.

| Sample                  | $d_H$ [nm]<br>resus. w/o PVA <sup>a</sup> | PDI<br>resus. w/o PVA <sup>a</sup> | $d_H$ [nm]<br>resus. w/ PVA <sup>b</sup> | PDI<br>Resus. w/ PVA <sup>b</sup> |
|-------------------------|-------------------------------------------|------------------------------------|------------------------------------------|-----------------------------------|
| <b>PValG</b>            | 563 ± 71                                  | 0.41 ± 0.04                        | 172 ± 13                                 | 0.18 ± 0.05                       |
| <b>PValG [MF-15]</b>    | 286 ± 66                                  | 0.28 ± 0.05                        | 170 ± 7                                  | 0.15 ± 0.05                       |
| <b>PValG [BRP-201]</b>  | 367 ± 210                                 | 0.27 ± 0.11                        | 152 ± 5                                  | 0.08 ± 0.02                       |
| <b>PLGA</b>             | 221 ± 19                                  | 0.10 ± 0.02                        | 215 ± 26                                 | 0.08 ± 0.02                       |
| <b>PLGA [MF-15]</b>     | 196 ± 6                                   | 0.10 ± 0.02                        | 195 ± 2                                  | 0.09 ± 0.03                       |
| <b>PLGA [BRP-201]</b>   | 203 ± 13                                  | 0.08 ± 0.02                        | 197 ± 22                                 | 0.07 ± 0.02                       |
| <b>Ac-Dex</b>           | 210 ± 38                                  | 0.21 ± 0.02                        | 215 ± 8                                  | 0.21 ± 0.03                       |
| <b>Ac-Dex [MF-15]</b>   | 184 ± 8                                   | 0.07 ± 0.01                        | 185 ± 7                                  | 0.06 ± 0.02                       |
| <b>Ac-Dex [BRP-201]</b> | 215 ± 12                                  | 0.08 ± 0.04                        | 190 ± 6                                  | 0.05 ± 0.01                       |
| <b>PPheG</b>            | 430 ± 75                                  | 0.26 ± 0.05                        | 241 ± 22                                 | 0.27 ± 0.08                       |
| <b>PPheG [MF-15]</b>    | 430 ± 136                                 | 0.33 ± 0.10                        | 285 ± 79                                 | 0.28 ± 0.07                       |
| <b>PPheG [BRP-201]</b>  | 352 ± 72                                  | 0.27 ± 0.02                        | 202 ± 29                                 | 0.16 ± 0.05                       |

a) Hydrodynamic diameter ( $d_H$ , z-average) and polydispersity index (PDI) determined by DLS after resuspension of the freeze-dried particles without (wo) the addition of PVA.

b) Hydrodynamic diameter ( $d_H$ , z-average) and polydispersity index (PDI) determined by DLS after resuspension of the freeze-dried particles with (w) the addition of small amounts (**PLGA**, **Ac-Dex** 1 µL, **PValG**, **PPheG** 10 µL) of 3% (w/v) PVA aqueous solution before freeze-drying.

All resuspensions were performed with n = 3 different formulations.

## 4.1 DLS

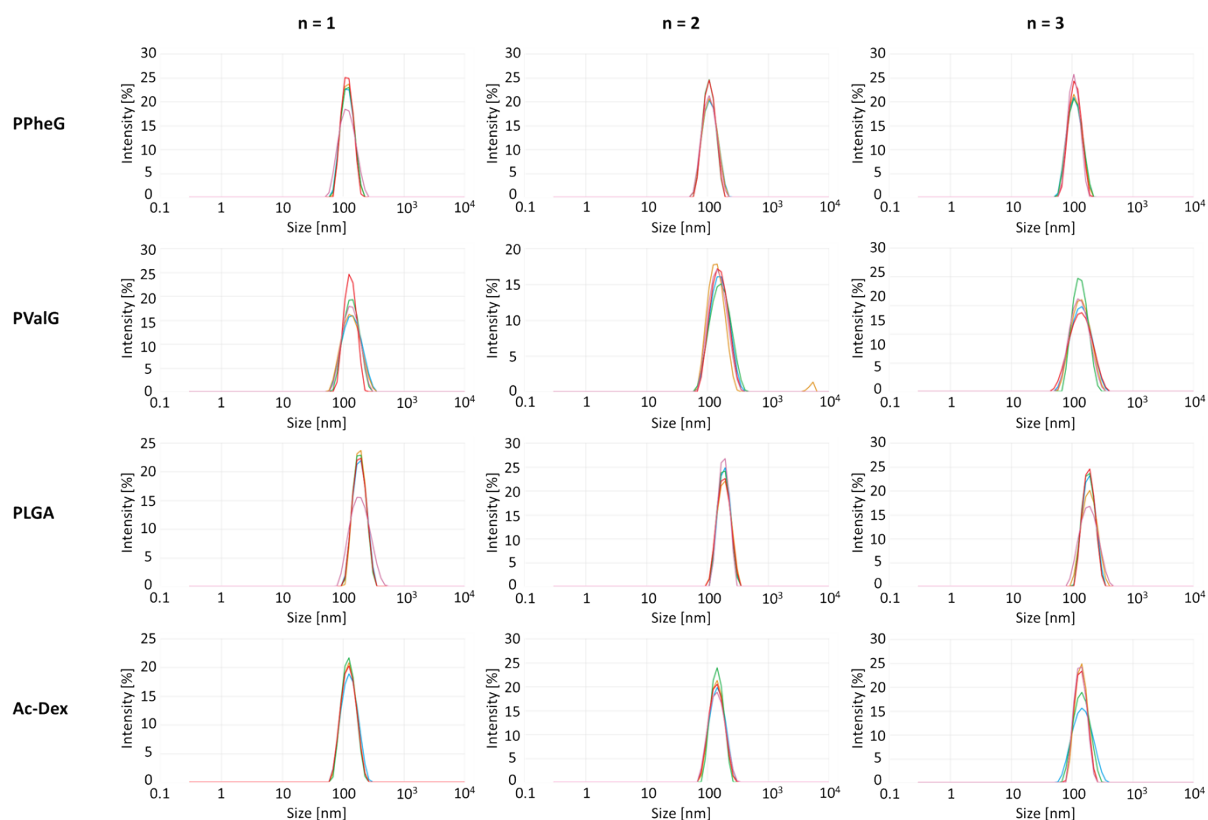

**Figure S4:** Intensity-based hydrodynamic diameter distributions from DLS measurements of purified blank particles (five measurements each of n = 3 individual formulations).

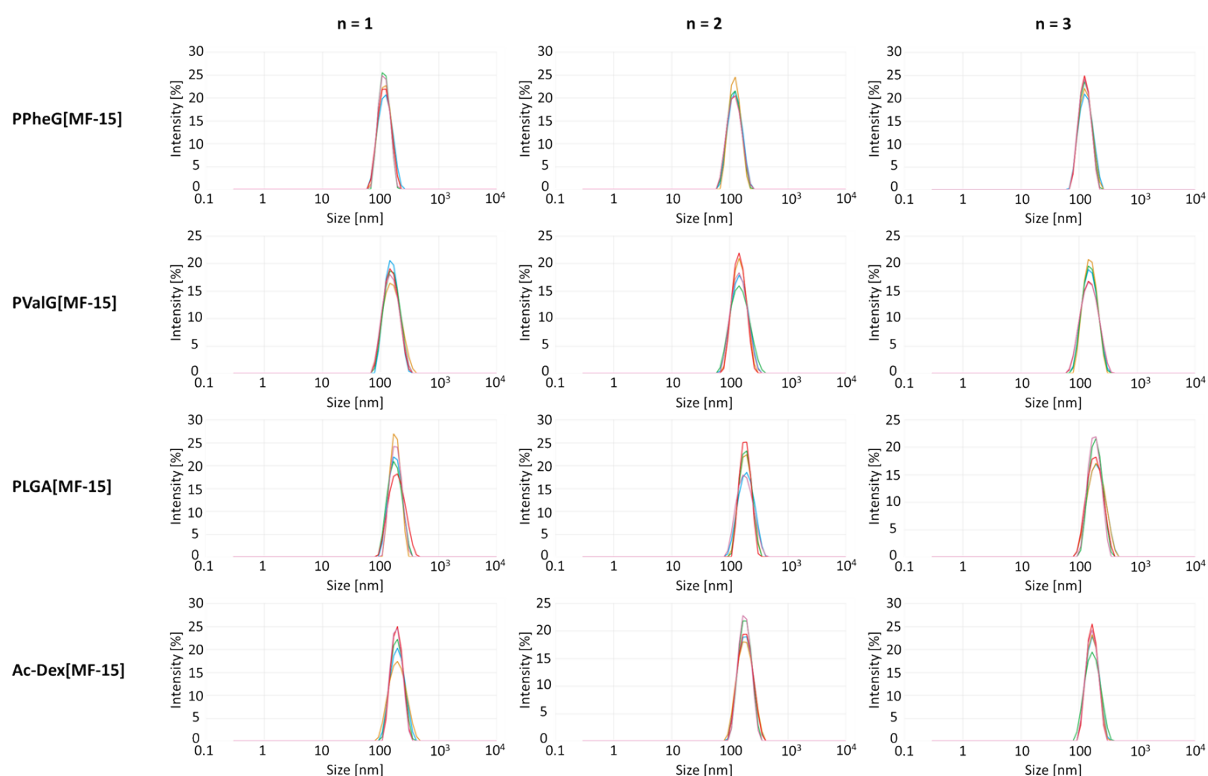

**Figure S5:** Intensity-based hydrodynamic diameter distributions from DLS measurements of purified MF-15 loaded particles (five measurements each of n = 3 individual formulations).

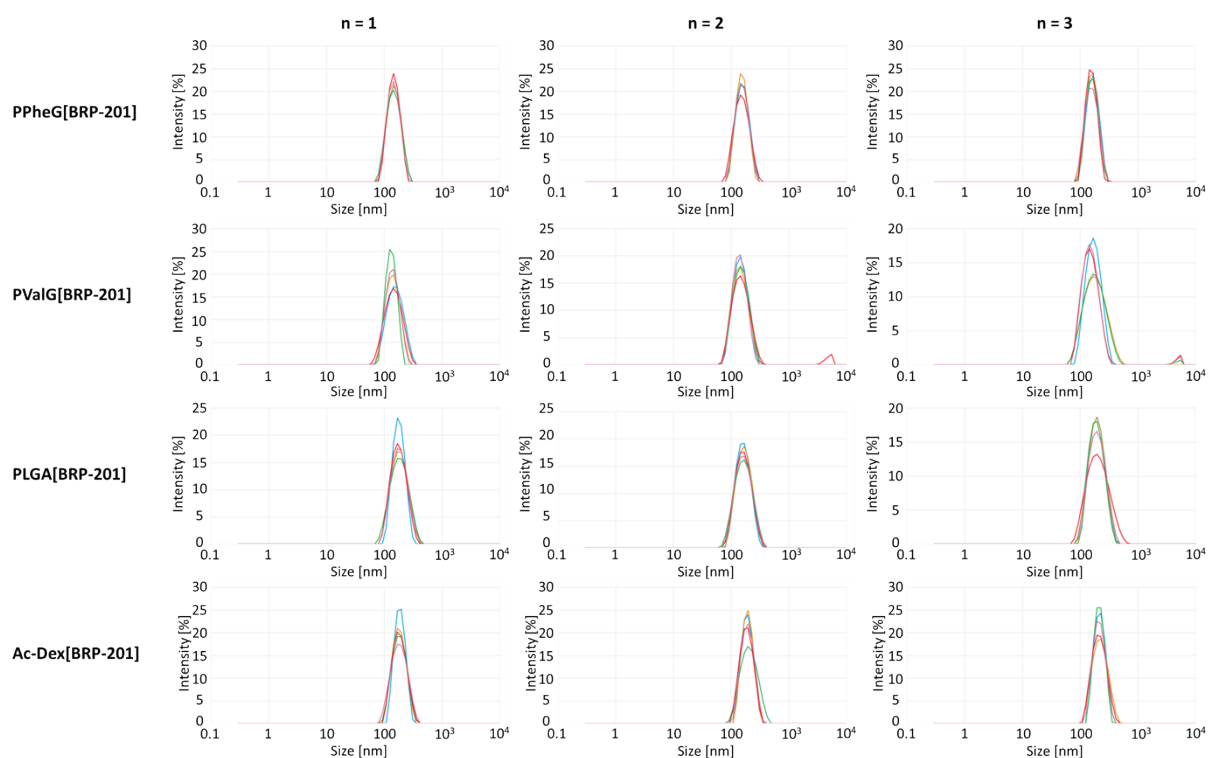

**Figure S6:** Intensity-based hydrodynamic diameter distribution from DLS measurements of BRP-201 loaded particles (five measurements each of  $n = 3$  individual formulations).

## 4.2 BRP-201 drug precipitates

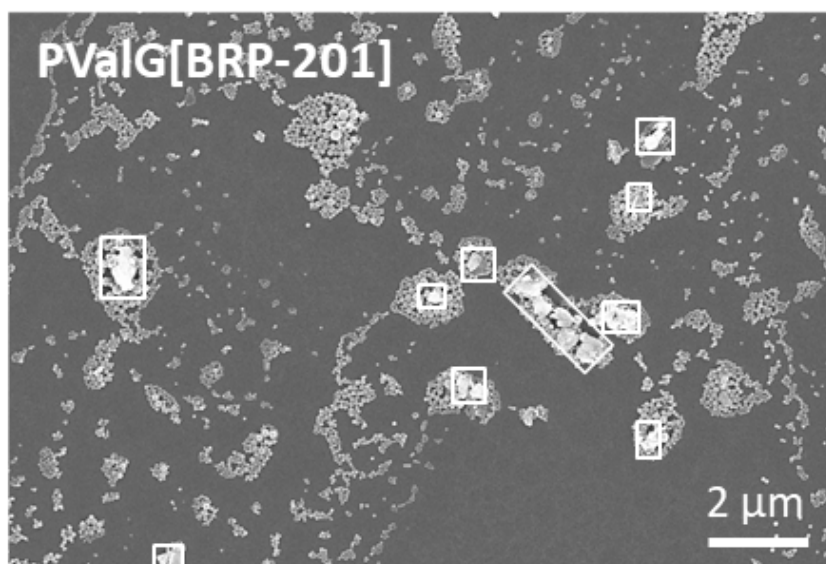

**Figure S7:** SEM image of BRP-201 loaded **PValG** particles showing free drug precipitates (highlighted with white frames) before additional purification *via* centrifugation.

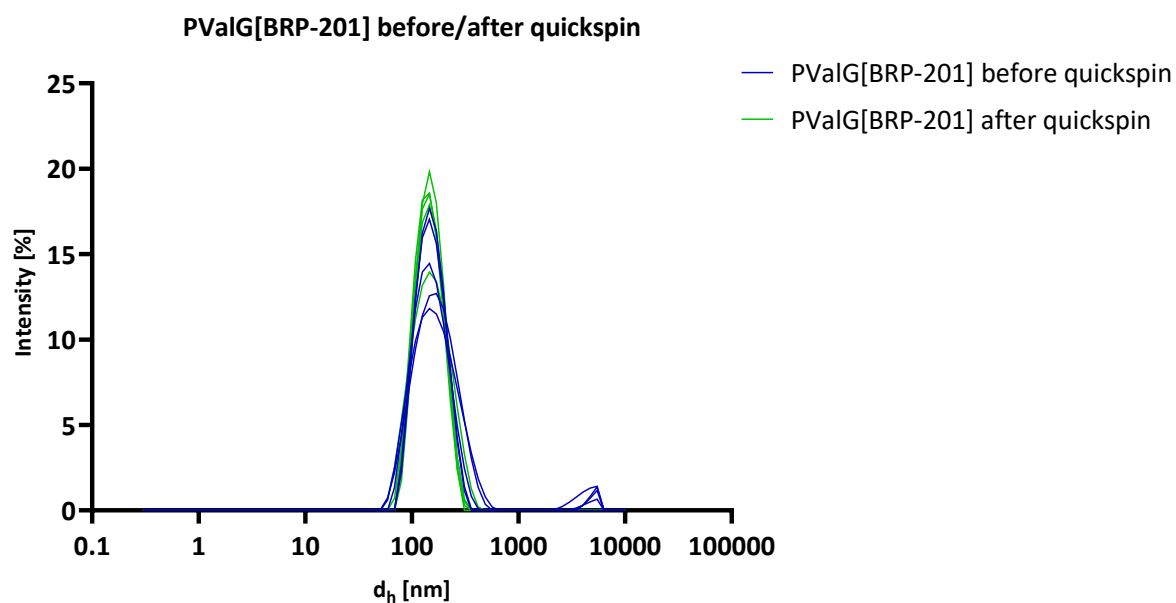

**Figure S8:** DLS size distributions of the five measurements of **PValG[BRP-201]** before and after additional purification using quick spin to remove the free drug precipitates from the particle formulation.

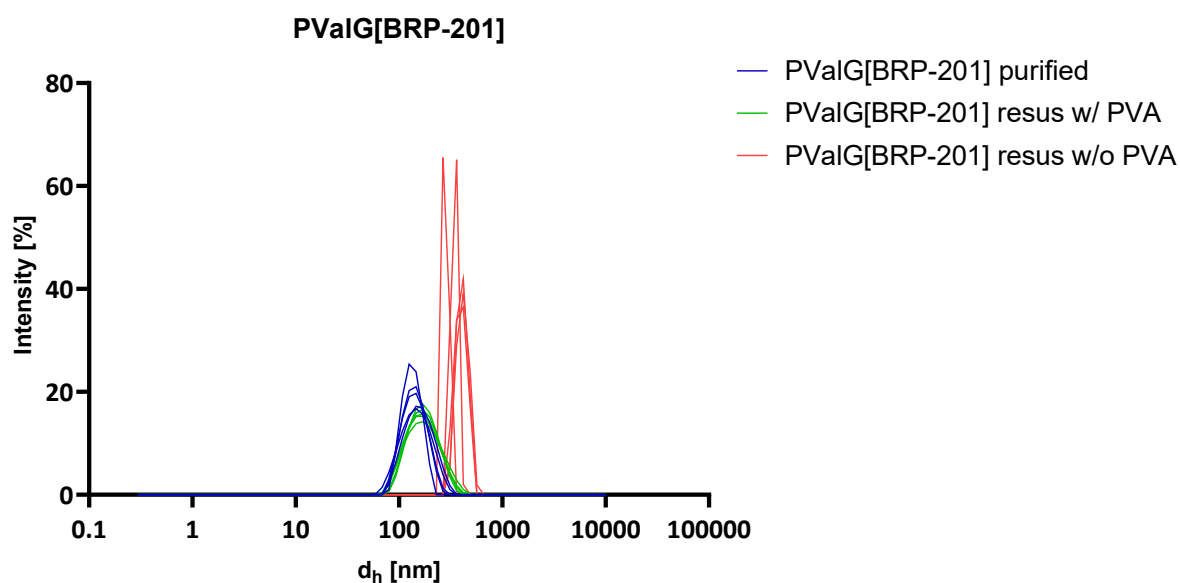

**Figure S9:** DLS size distributions of the five measurements of **PValG[BRP-201]** after purification and resuspension with (w/) and without (w/o) PVA.

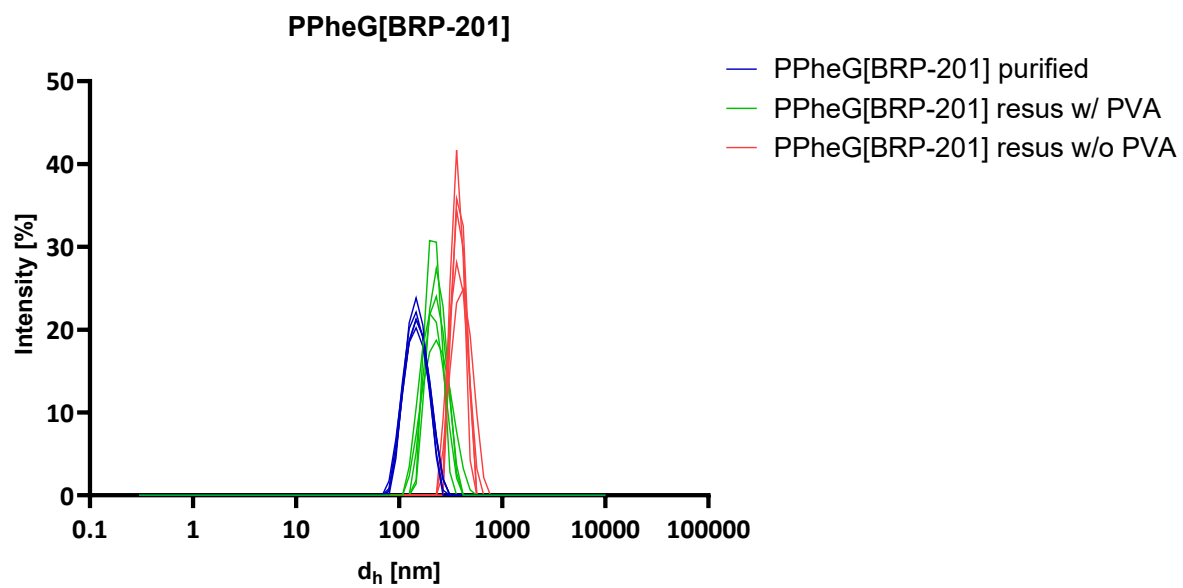

**Figure S10:** Size distributions of the five measurements of **PPheG[BRP-201]** after purification and resuspension with (w) and without (wo) PVA.

## 5 HPLC measurements

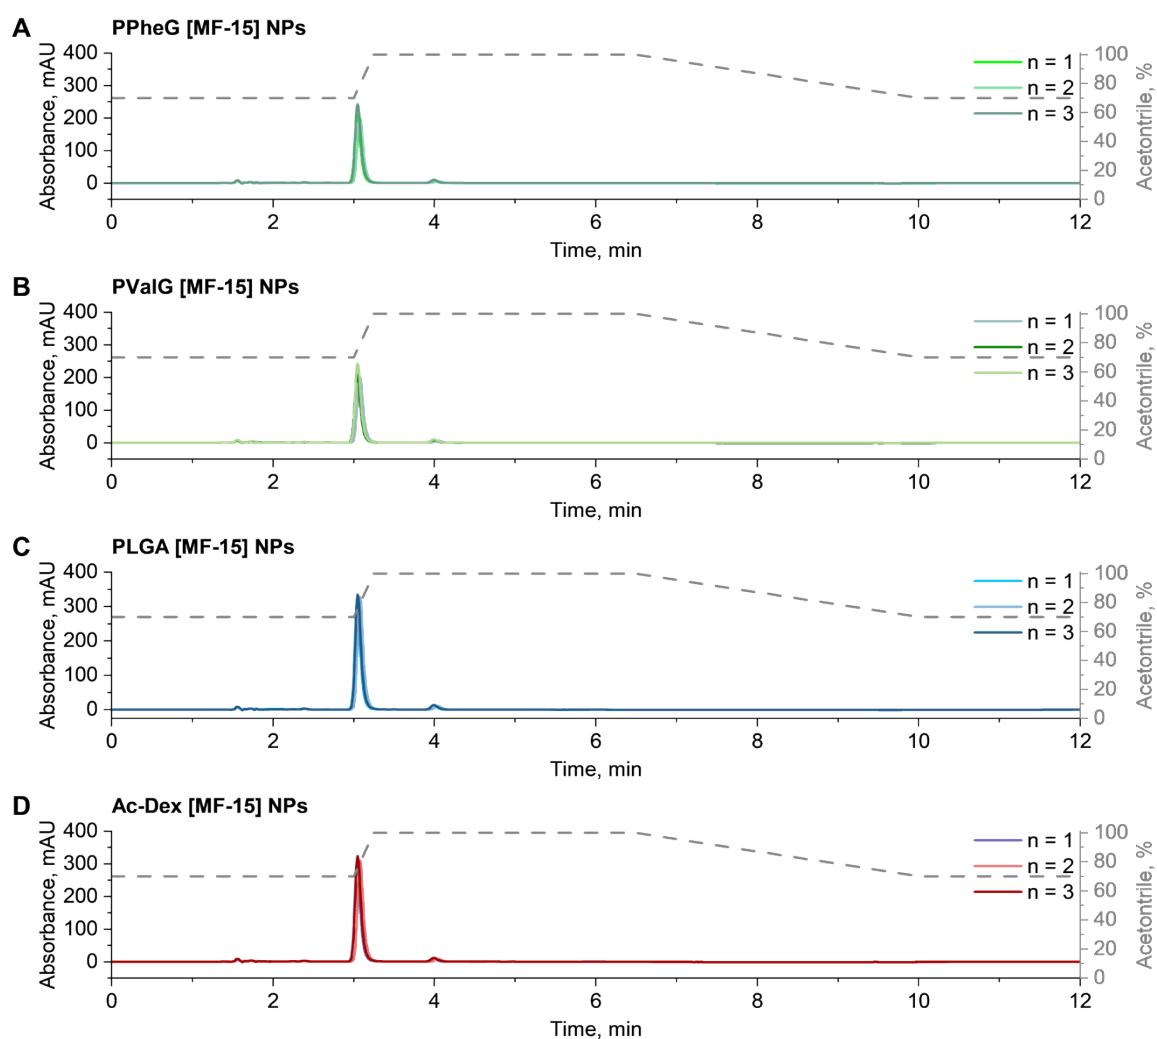

**Figure S11:** Overlaid elugrams recorded by DAD at 290 nm and received from three repetitive formulations containing MF-15 for each polymer ( $n = 1, 2, 3$ ). (A) PPheG, (B) PValG, (C) PLGA, and (D) Ac-Dex nanoparticles. The peak at 3.1 min elution time refers to MF-15. The gray dashed line indicates the CH<sub>3</sub>CN gradient elution program. Chromatographic conditions: CH<sub>3</sub>CN/0.1 wt% aqueous H<sub>3</sub>PO<sub>4</sub> as the mobile phase, flow rate 1 mL min<sup>-1</sup>.

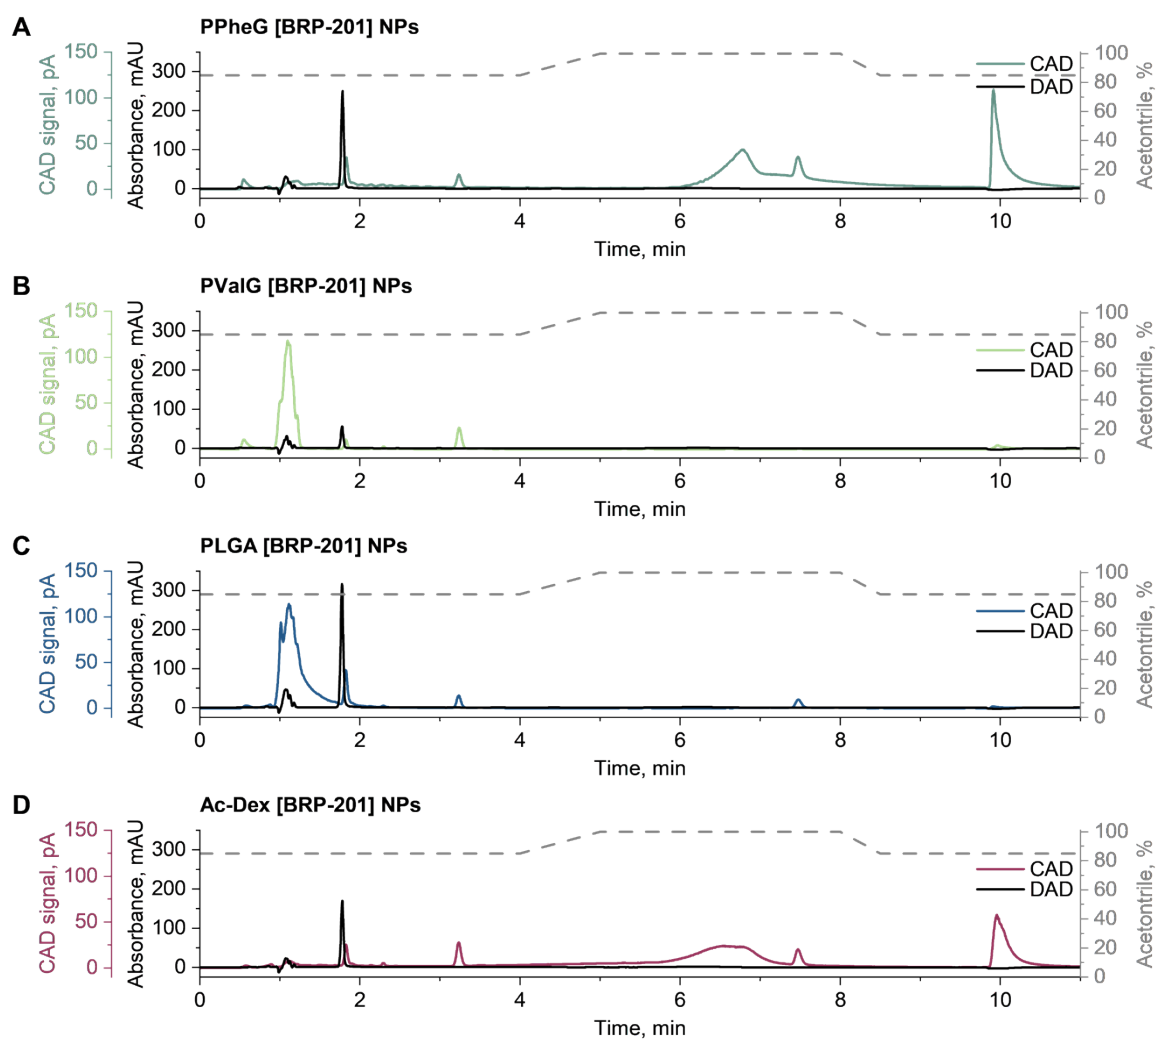

**Figure S12:** Elution pattern of one exemplified batch of BRP-201-loaded polymer NPs recorded by universal CAD (colored trace) and DAD (black trace) operated at 312 nm. The gray dashed line indicates the gradient elution programming of the acetonitrile/water mobile phase.

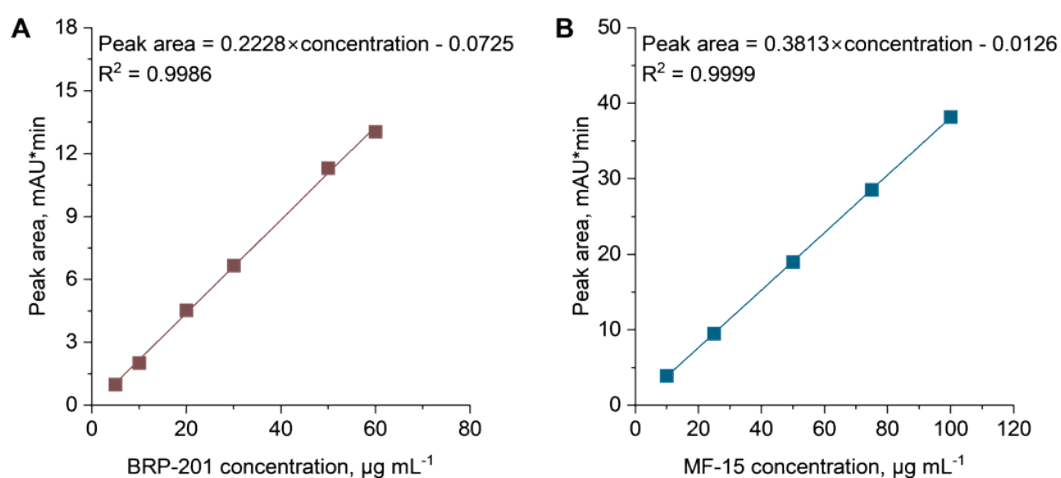

**Figure S13:** Calibration curves for (A) BRP-201 and (B) MF-15 presented by plotting peak areas as a function of analyte concentrations. Data were fitted linearly.

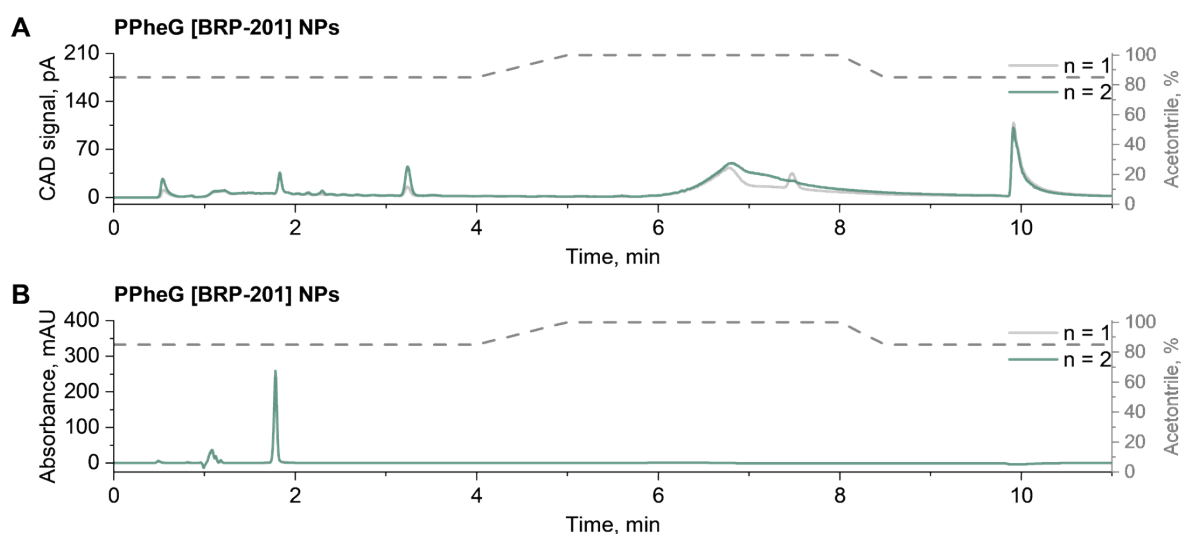

**Figure S14:** Overlaid elugrams of two repetitive formulations of **PPheG** NPs containing BRP-201 ( $n = 1, 2$ ) recorded by **(A)** CAD and **(B)** DAD at 312 nm. The peak at 1.8 min elution time refers to BRP-201. The gray dashed line indicates the  $\text{CH}_3\text{CN}$  gradient elution programming. Measurement conditions:  $\text{CH}_3\text{CN}/\text{H}_2\text{O}$  mobile phase, flow rate  $1.5 \text{ mL min}^{-1}$ .

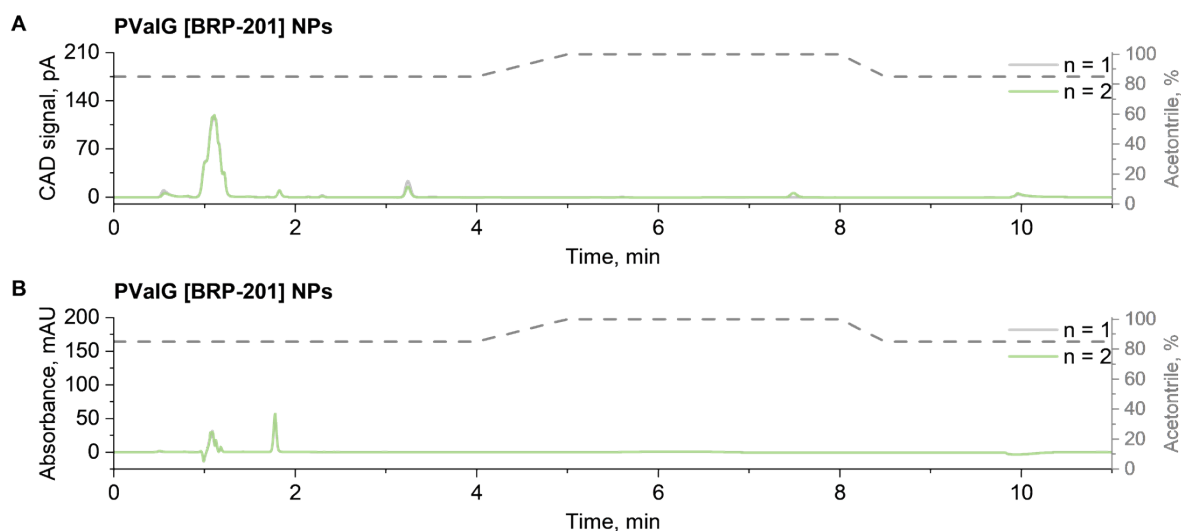

**Figure S15:** Overlaid elugrams of two repetitive formulations ( $n = 1, 2$ ) of **PPheG** NPs containing BRP-201 recorded by **(A)** CAD and **(B)** DAD at 312 nm. The peak at 1.8 min elution time refers to BRP-201. The gray dashed line indicates the  $\text{CH}_3\text{CN}$  gradient elution programming. Measurement conditions:  $\text{CH}_3\text{CN}/\text{H}_2\text{O}$  mobile phase, flow rate  $1.5 \text{ mL min}^{-1}$ .

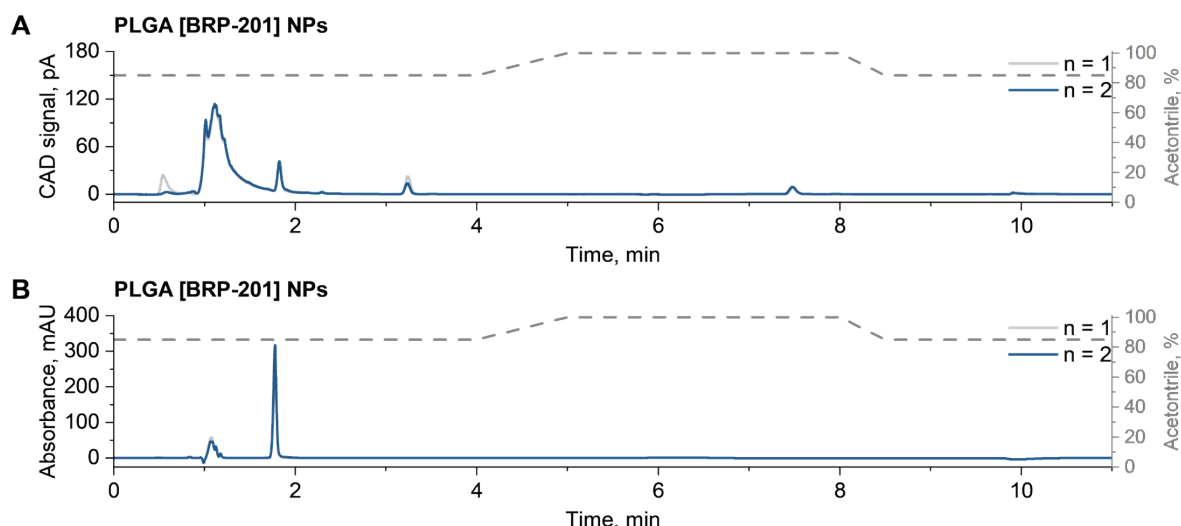

**Figure S16:** Overlaid elugrams of two repetitive formulations ( $n = 1, 2$ ) of **PLGA** NPs containing BRP-201 recorded by (A) CAD and (B) DAD at 312 nm. The peak at 1.8 min elution time refers to BRP-201. The gray dashed line indicates the  $\text{CH}_3\text{CN}$  gradient elution program. Measurement conditions:  $\text{CH}_3\text{CN}/\text{H}_2\text{O}$  mobile phase, flow rate  $1.5 \text{ mL min}^{-1}$ .

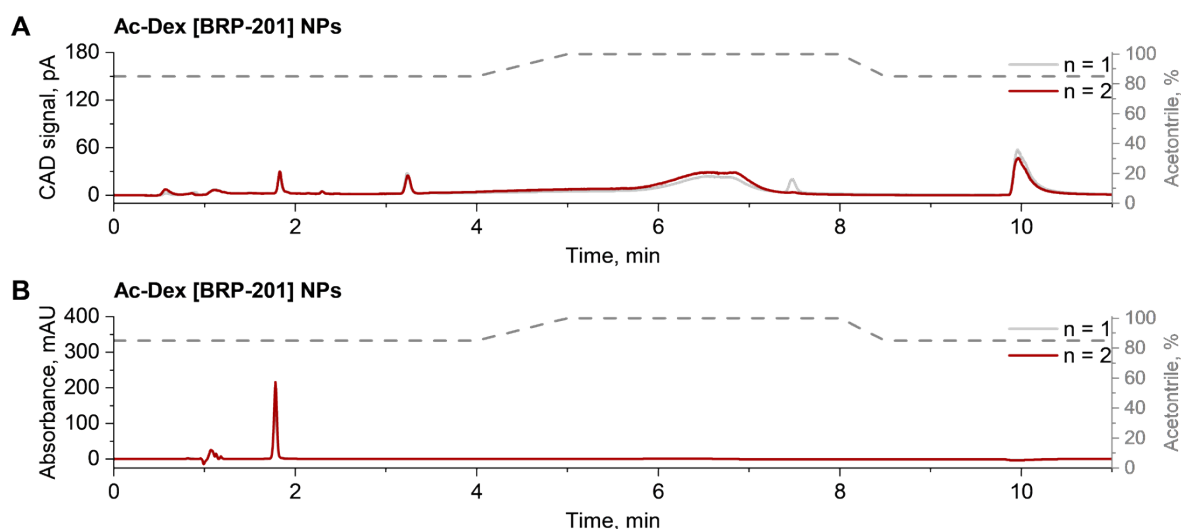

**Figure S17:** Overlaid elugrams of three repetitive formulations ( $n = 1, 2$ ) of **Ac-Dex** NPs containing BRP-201 recorded by (A) CAD and (B) DAD at 312 nm. The peak at 1.8 min elution time refers to BRP-201. The gray dashed line indicates the  $\text{CH}_3\text{CN}$  gradient elution programming. Measurement conditions:  $\text{CH}_3\text{CN}/\text{H}_2\text{O}$  mobile phase, flow rate  $1.5 \text{ mL min}^{-1}$ .

## 6 References

- [1] M. Dirauf, D. Bandelli, C. Weber, H. Görls, M. Gottschaldt, U. S. Schubert, *Macromol. Rapid Commun.* **2018**, *39*, 1800433.
- [2] N. E. Göppert, M. Dirauf, P. Liebing, C. Weber, U. S. Schubert, *Macromol. Rapid Commun.* **2023**, *44*, 2200651.
- [3] R. C. Pratt, B. G. G. Lohmeijer, D. A. Long, P. N. P. Lundberg, A. P. Dove, H. Li, C. G. Wade, R. M. Waymouth, J. L. Hedrick, *Macromolecules* **2006**, *39*, 7863-7871.

- [4] E. M. Bachelder, T. T. Beaudette, K. E. Broaders, J. Dashe, J. M. J. Fréchet, *J. Am. Chem. Soc.* **2008**, *130*, 10494-10495.
- [5] K. E. Broaders, J. A. Cohen, T. T. Beaudette, E. M. Bachelder, J. M. J. Fréchet, *Proc. Natl. Acad. Sci.* **2009**, *106*, 5497-5502.
